# Supplementary material for: Comparison of prognostic prediction models for rectal gastrointestinal stromal tumor
Source: publisher site journal article supplement (doi:10.18632/aging.103204), 2020-06-20
Supplement: Supplementary file [file aging-v12i12-103204-supplementary-material-SD1.pdf]

SUPPLEMENTARY FIGURES

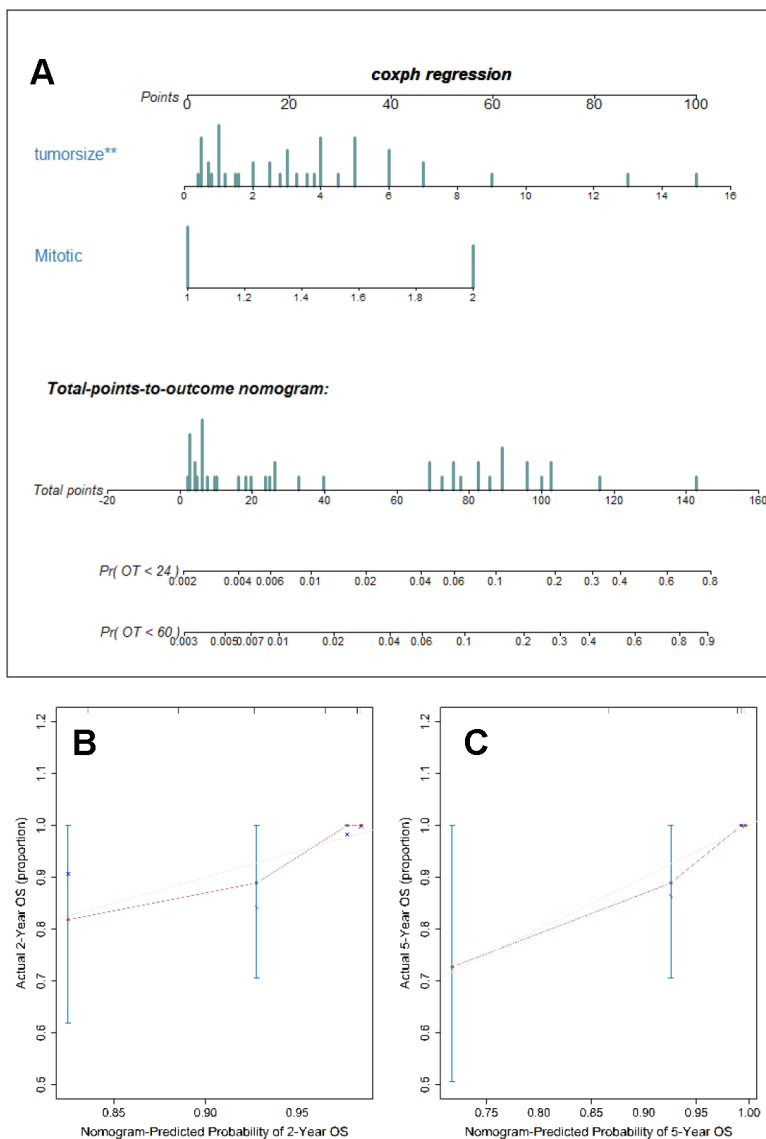

**Supplementary Figure 1. Nomogram and validation to predict the probabilities of 2-year and 5-year overall survival (A). The calibration curve for predicting patient survival at (B) 2 years and (C) 5 years in the training set.**

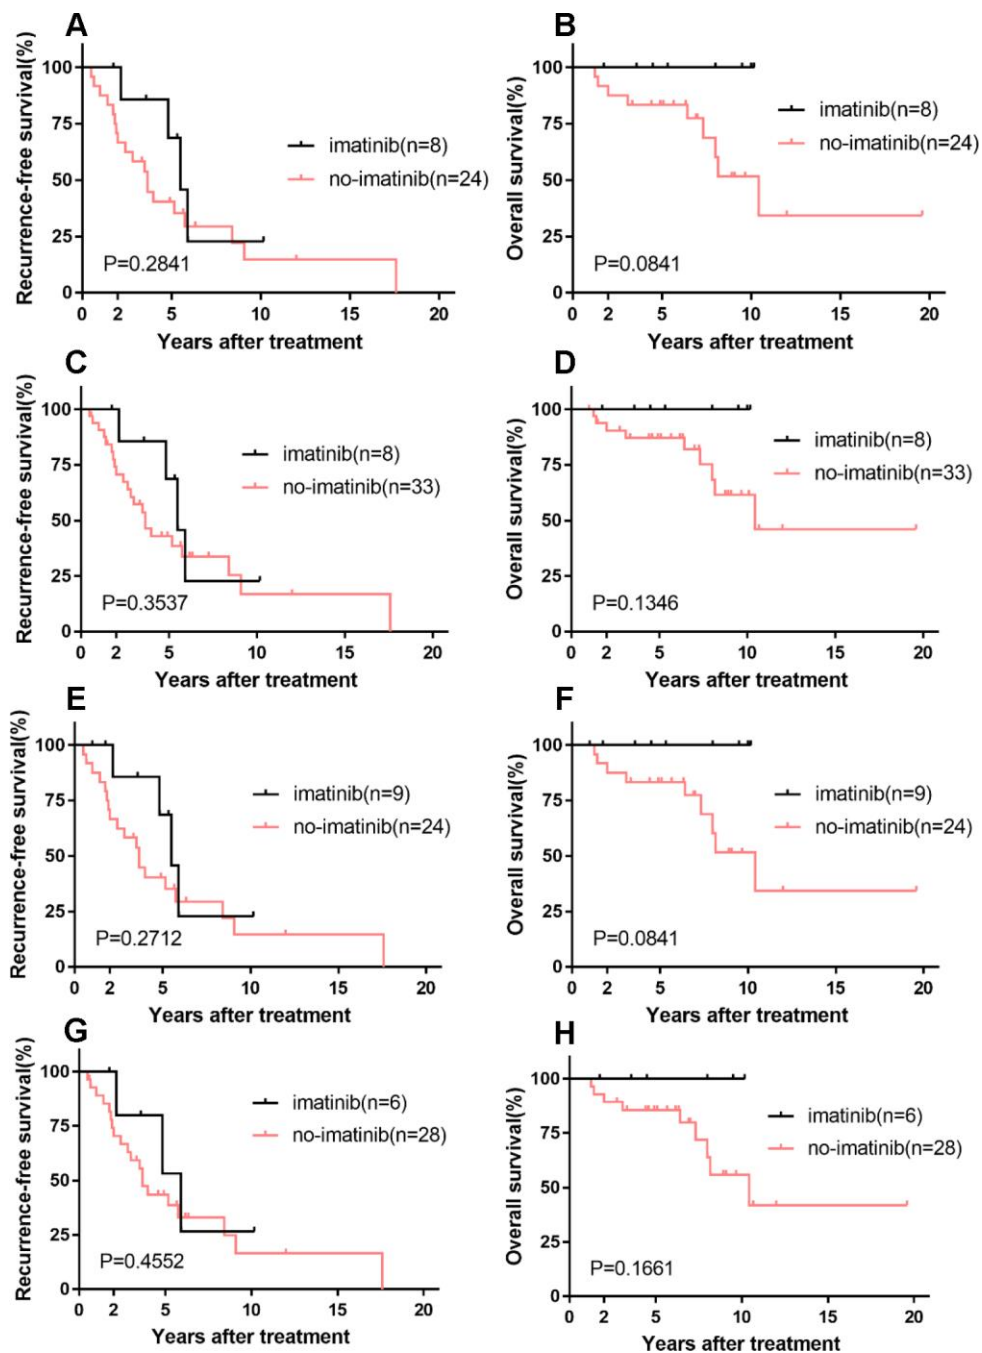

Supplementary Figure 2. Kaplan-Meier survival plot of OS and RFS based on imatinib in higher risk. FD-ZS II (A, B), FD-Hou II (C, D), WHO III (E, F), NIH IV (G, H).
