# Supplementary material for: Comparison of prognostic prediction models for rectal gastrointestinal stromal tumor
Source: Aging (Albany NY). 2020 Jun 20;12(12):11416–30. doi: 10.18632/aging.103204 (PMC7343501; doi:10.18632/aging.103204)
Supplement: Supplementary Table 1 [file aging-12-103204-s002..xlsx]

## Sheet: Sheet1
	Supplementary Table 1. Cox regression (RFS/OS) and logistic regression based on imatinib and no-imatinib.
	Characteristic	Variable	Recurrence-free survival					Overall survival					Viarables to treatment
			Univariate Cox regression		Multi-variate Cox regression			Univariate Cox regression		Multi-variate Cox regression			Univariate Logistic regression		Multi-variate Logistic regression
			HR(95% CI)	P valuea	HR(95% CI)	P valuea		HR(95% CI)	P valuea	HR(95% CI)	P valuea		OR(95% CI)	P valuea	OR(95% CI)	P valuea
	Sex	Male	reference	0.874				reference	0.147
		Female	0.943(0.456-1.950)					0.214(0.027-1.719)
	Procedure of treatment	LE	reference	0.039	1.062(0.829-1.361)	0.633		reference	0.139				2.555(1.794-3.639)	0	2.444(1.639-3.645)	0
		APR/TPE	0.337(0.121-0.937)					3491.065(0.000-.)
		Imatinib	0.880(0.328-2.364)					28876.523(0.000-.)
		Neoadjuvant	0.318(0.089-1.132)					0.888(0.000-.)
		Otherb	-					0.979(0.000-.)
	Center	Out-zhongshan	reference	0.195				reference	0.302
		Zhongshan	0.630(0.314-1.267)					2.300(0.473-11.180)
	Mutation	Wild type	reference	0.291				reference	0.881
		KIT exon 9	1.685(0.104-27.212)					1.071(0.000-.)
		KIT exon 11	5.239(0.705-38.933)					32.218(0.001-.)
	IM after the first surgery	No	reference	0.838				reference	0.594
		Yes	1.092(0.469-2.540)					39.054(0.000-.)
		Otherc	-					1.161(0.000-.)
	Cell type	Mixed	reference	0.134				reference	0.014	reference	0.029		reference	0.416
		Spindle	4.717(0.619-35.969)					17.805(1.798-176.293)		0.074(0.007-0.769)			0.364(0.032-4.149)
	DOG1	-	reference	0.485
		+	2.131(0.255-17.809)
	CD117	-	reference	0.562				reference	0.812
		+	0.045(0.000-1632.359)					0.046(0.000-.)
	CD34	-	reference	0.582				reference	0.832
		+	21.328(0.000-.)					21.750(0.000-.)
	SMA	-	reference	0.426				reference	0.506
		+	1.518(0.543-4.248)					2.163(0.222-21.059)
	DES	-	reference	0.575				reference	0.848
		+	22.197(0.000-.)					22.776(0.000-.)
	S100	-	reference	0.618				reference
		+	0.766(0.268-2.186)					4.771(0.471-48.308)
	Age	years±SD	1.007(0.980-1.035)	0.629				1.063(1.010-1.118)	0.019	1.050(0.993-1.110)	0.086		0.969(0.939-1.000)	0.047	0.937(0.898-0.977)	0.002
	Distance to AV	cm±SD	0.886(0.726-1.082)	0.234				0.686(0.389-1.210)	0.193
	Time of IM	months±SD	0.982(0.952-1.014)	0.263				0.878(0.665-1.160)	0.36
	Tumor size at diagnosis	cm±SD	1.153(1.061-1.253)	0.001	1.148(1.053-1.252)	0.002		1.015(0.994-1.037)	0.003	1.209(1.023-1.428)	0.026		1.276(1.101-1.480)	0.001	1.145(0.969-1.352)	0.111
	Mitotic counts (50 HPFs)		1.009(0.995-1.022)	0.2				1.015(0.994-1.037)	0.172
	Treatment	no-imatinib	reference	0.388				reference	0.222
		imatinib	0.702(0.315-1.566)					0.025(0.000-9.353)
	b: For Kraske or surgical procedure unknown
	c: For some patients(n=10) with imatinib but not surgery
	OR: odd ratio; HR: hazard ratio; “.”: indicate the exceeded value
