# Supplementary material for: Comparison of prognostic prediction models for rectal gastrointestinal stromal tumor
Source: Aging (Albany NY). 2020 Jun 20;12(12):11416–30. doi: 10.18632/aging.103204 (PMC7343501; doi:10.18632/aging.103204)
Supplement: Supplementary Table 2 [file aging-12-103204-s003..xlsx]

## Sheet: Sheet1
	Supplementary Table 2. Cox regression (RFS/OS) and logistic regression based on resection and neoadjuvant.
	Characteristic	Variable	Recurrence-free survival					Overall survival					Viarables to treatment
			Univariate Cox regression		Multi-variate Cox regression			Univariate Cox regression		Multi-variate Cox regression			Univariate Logistic regression		Multi-variate Logistic regression
			OR(95% CI)	P valuea	OR(95% CI)	P valuea		OR(95% CI)	P valuea	OR(95% CI)	P valuea		OR(95% CI)	P valuea	OR(95% CI)	P valuea
	Sex	Male	reference	0.928				reference	0.178
		Female	1.037(0.470-2.286)					4.203(0.521-33.915)
	Procedure of treatment	LE	reference	0.055				reference	0.07
		APR/TPE	2.838(1.209-6.660)					8.511(1.753-41.324)
		Imatinib	0.914(0.280-2.986)					0.000(0.000-.)
		Neoadjuvant	2.191(0.585-8.199)					0.000(0.000-.)
	Center	Out-zhongshan	reference	0.261				reference	0.455
		Zhongshan	0.649(0.305-1.380)					1.825(0.376-8.854)
	IM after the first surgery	No	reference	0.654				reference	0.463
		Yes	0.759(0.226-2.542)					0.037(0.000-242.795)
	Cell type	Mixed	reference	0.147				reference	0.01	reference	0.006		reference	0.531
		Spindle	0.221(0.029-1.698)					0.050(0.005-0.492)		0.031(0.003-0.363)			0.407(0.024-6.771)
	Age	years±SD	1.006(0.978-1.035)	0.667				1.061(1.010-1.115)	0.019	1.038(0.984-1.094)	0.169		0.954(0.916-0.994)	0.024	0.955(0.905-1.007)	0.089
	Distance to AV	cm±SD	0.897(0.736-1.092)	0.279				0.636(0.367-1.101)	0.106
	Time of IM	months±SD	0.965(0.904-1.030)	0.281				0.785(0.478-1.288)	0.338
	Tumor size at diagnosis	cm±SD	1.147(1.052-1.250)	0.002	1.140(1.039-1.251)	0.006		1.250(1.078-1.450)	0.003	1.277(1.066-1.530)	0.008		1.253(1.067-1.472)	0.006	1.590(1.233-2.050)	0
	Mitotic counts(50 HPFs)		1.028(1.008-1.048)	0.006	1.024(1.003-1.046)	0.022		1.030(1.001-1.059)	0.04	1.035(1.001-1.071)	0.046		0.823(0.699-0.970)	0.02	0.731(0.576-0.928)	0.01
	Treatment	Resection	reference	0.266				reference	0.311
		Neoadjuvant	0.548(0.189-1.582)					0.032(0.000-25.033)
