# Supplementary material for: Comparison of prognostic prediction models for rectal gastrointestinal stromal tumor
Source: Aging (Albany NY). 2020 Jun 20;12(12):11416–30. doi: 10.18632/aging.103204 (PMC7343501; doi:10.18632/aging.103204)
Supplement: Supplementary Table 4 [file aging-12-103204-s004..xlsx]

## Sheet: Sheet4
	Supplementary Table 4. Cox regression (RFS/OS) and logistic regression based on resection and adjuvant.
	Characteristic	Variable	Recurrence-free survival				Overall survival				Viarables to treatment
			Univariate Cox regression		Multi-variate Cox regression		Univariate Cox regression		Multi-variate Cox regression		Univariate Logistic regression
			OR(95% CI)	P valuea	OR(95% CI)	P valuea	OR(95% CI)	P valuea	OR(95% CI)	P valuea	OR(95% CI)	P valuea
	Sex	Male	reference	0.507			reference	0.107
		Female	1.297(0.601-2.799)				5.568(0.691-44.864)
	Procedure of treatment	LE	reference	0.036	reference	0.602	reference	0.032	reference	0.994
		APR/TPE	2.609(1.141-5.969)		0.639(0.173-2.363)		8.272(1.711-39.979)		3023.835(0.000-.)
		Otherb	3.025(1.084-8.442)		1.128(0.331-3.842)		0.000(0.000-.)		0.000(0.000-.)
	Center	Out-zhongshan	reference	0.089			reference	0.447
		Zhongshan	0.518(0.242-1.107)				1.852(0.379-9.054)
	Mutation	Wild type	reference	0.295			reference	0.858
		KIT exon 9	2.964(0.181-48.582)				1.001(0.000-.)
		KIT exon 11	6.407(0.851-48.209)				35.167(0.003-.)
	IM after the first surgery	No	reference	0.96			reference	0.469
		Yes	0.973(0.337-2.812)				0.040(0.000-248.440)
	Cell type	Mixed	reference	0.003	reference	0.012	reference	1			reference	1
		Spindle	0.015(0.001-0.235)		0.013(0.000-0.381)		1.000(0.000-.)				0.000(0.000-.)
	CD117	-	reference	0.546			reference	0.79
		+	22.797(0.001-.)				22.103(0.000-.)
	CD34	-	reference	0.583			reference	0.824
		+	21.570(0.000-.)				21.958(0.000-.)
	SMA	-	reference	0.525			reference	0.311
		+	0.706(0.241-2.066)				0.304(0.030-3.041)
	DES	-	reference	0.675			reference	0.848
		+	0.046(0.000-.)				0.044(0.000-.)
	S100	-	reference	0.639			reference	0.24
		+	0.772(0.263-2.271)				3.988(0.397-40.015)
	FD-Hou	Non-malignant	reference	0.001			reference	0.161
		Malignant	7.606(2.292-25.239)				50.332(0.210-.)
	WHO 2013	Very low, if any malignant potential	reference	0.003			reference	0.286
		Low malignant potential	2.979(0.340-26.099)				0.950(0.000-.)
		Intermediate or High malignant potential	5.259(1.992-13.882)				77.361(0.268-.)
	NIH 2008	Very low	reference	0.016			reference	0.498
		Low	3.779(0.626-22.829)				1.041(0.000-.)
		Intermediate	3.711(0.331-41.609)				1.040(0.000-.)
		High	8.829(2.070-37.646)				69.198(0.105-.)
	Peritoneal dissemination	-	reference	0.322			reference	0.864
		+	2.768(0.369-20.778)				0.049(0.000-.)
	Vascular infiltration	-	reference	0.314			reference	0.008
		+	2.110(0.493-9.023)				8.750(1.760-43.505)
	Fatty infiltration	-	reference	0.718			reference	0.733
		+	0.691(0.093-5.117)				0.046(0.000-.)
	Nerve infiltration	-	reference	0.366			reference	0.406
		+	1.520(0.613-3.766)				0.037(0.000-86.516)
	Mucosal infiltration	-	reference	0.591			reference	0.837	reference	0.998
		+	0.048(0.000-3150.850)				0.048(0.000-.)		0.008(0.000-.)
	Mitoses ≧10/50HPF	-	reference	0.001	reference	0.014	reference	0.03	reference	0.045	reference	0.001
		+	3.730(1.694-8.212)		3.501(1.287-9.525)		10.045(1.254-80.440)		9155.298(1.221-.)		5.610(1.956-16.094)
	Muscle infiltration	-	reference	0.05	reference	0.598	reference	0.004	reference	0.212
		+	2.109(0.999-4.451)		1.249(0.547-2.854)		10.796(2.168-53.749)		5.162(0.391-68.114)
	Coagulative necrosis	-	reference	0.008	reference	0.93	reference	0.022	reference	0.489
		+	2.710(1.290-5.694)		0.959(0.378-2.435)		5.091(1.270-20.413)		0.421(0.036-4.874)
	Perivascular pattern	-	reference	0.039	reference	0.474	reference	0.057
		+	2.168(1.039-4.522)		0.698(0.260-1.871)		3.663(0.962-13.949)
	Severe nuclear atypia	-	reference	0.008	reference	0.93	reference	0.001	reference	0.053
		+	3.191(1.345-7.571)		0.942(0.246-3.610)		10.724(2.610-44.062)		25.400(0.955-675.737)
	Age	years±SD	1.007(0.977-1.038)	0.643			1.059(1.007-1.115)	0.027	1.088(0.967-1.225)	0.162
	Distance to AV	cm±SD	0.888(0.721-1.094)	0.264			0.759(0.445-1.293)	0.31
	Time of IM	months±SD	0.987(0.953-1.022)	0.465			0.906(0.673-1.221)	0.518
	Tumor size at diagnosis	cm±SD	1.148(1.058-1.246)	0.001	1.217(0.999-1.481)	0.051	1.249(1.089-1.432)	0.001	1.442(0.906-2.296)	0.123
	Mitotic counts(50 HPFs)		1.007(0.993-1.021)	0.312			1.010(0.988-1.033)	0.376	0.952(0.881-1.028)	0.207
	Treatment	Resection	reference	0.054			reference	0.021	reference	0.94
		Adjuvant	2.070(0.987-4.341)				6.474(1.329-31.527)		0.001(0.000-.)
	b:For Kraske or surgical procedure unknown
