# Supplementary material for: Comparison of prognostic prediction models for rectal gastrointestinal stromal tumor
Source: Aging (Albany NY). 2020 Jun 20;12(12):11416–30. doi: 10.18632/aging.103204 (PMC7343501; doi:10.18632/aging.103204)
Supplement: Supplementary Table 5 [file aging-12-103204-s001..xlsx]

## Sheet: Sheet1
	Supplementary Table 5. Cox regression (RFS/OS) to select the variables for nomogram.
	Characteristic	Variable	Recurrence-free survival				Overall survival
			Univariate Cox regression		Multi-variate Cox regression		Univariate Cox regression		Multi-variate Cox regression
			OR(95% CI)	P valuea	OR(95% CI)	P valuea	OR(95% CI)	P valuea	OR(95% CI)	P valuea
	Sex	Male	reference	0.285			reference	0.289
		Female	1.863(0.596-5.830)				3.164(0.376-26.657)
	Procedure of treatment	LE	reference	0.025			reference	0.046
		APR/TPE	4.461(1.516-13.128)				14.627(1.755-121.8)
		Otherb	2.921(0.336-25.410)				0.000(0.000-0.000)
	Mutation	Wild type	reference	0.998			reference	0.809
		KIT exon 9	1.026(0.000-0.000)				1.075(0.000-.)
		KIT exon 11	137248.138(0.000-.)				46.548(0.006-.)
	IM after the first surgery	No	reference	0.682			reference	0.826
		Yes	0.047(0.000-.)				0.048(0.000-.)
	FD-Hou	Non-malignant	reference	0.005			reference	0.166
		Malignant	8.286(1.870-36.718)				75.243(0.167-.)
	WHO 2013	Benign(1;2;3a)	reference	0.016			reference
		Intermediate(4)	0.000(0.000-0.000)
		Malignant(3b;5;6a;6b)	6.383(1.811-22.499)
	NIH 2008	Very low	reference	0.087			reference
		Low	6.952(0.623-77.573)
		Intermediate	0.000(0.000-0.000)
		High	13.341(1.735-102.603)
	Mitotic counts(50 HPFs)	≦5/50HPF	reference	0.01	reference	0.034	reference	0.038	reference	0.051
		>5/50HPF	4.460(1.428-13.928)		3.452(1.097-10.863)		9.416(1.126-78.722)		13.162(0.985-175.926)
	Age		1.015(0.972-1.059)	0.502			1.063(0.993-1.136)	0.077
	Time of IM after the first surgery		0.936(0.682-1.284)	0.682			0.936(0.518-1.690)	0.826
	Tumor size at diagnosis		1.184(1.065-1.316)	0.002	1.187(1.040-1.354)	0.011	1.248(1.083-1.438)	0.002	1.360(1.085-1.705)	0.008
	b:For Kraske or surgical procedure unknown
